# Supplementary material for: PDB-wide identification of physiological hetero-oligomeric assemblies based on conserved quaternary structure geometry
Source: PubMed Central journal article supplement — Structure. 2021 Nov 4;29(11):1303–1311.e3. doi: 10.1016/j.str.2021.07.012 (PMC8575123; doi:10.1016/j.str.2021.07.012), 2021-11-04
Supplement: mmc5.pdf [file mmc5.pdf]

# Structure

## PDB-wide identification of physiological hetero-oligomeric assemblies based on conserved quaternary structure geometry

### Graphical abstract

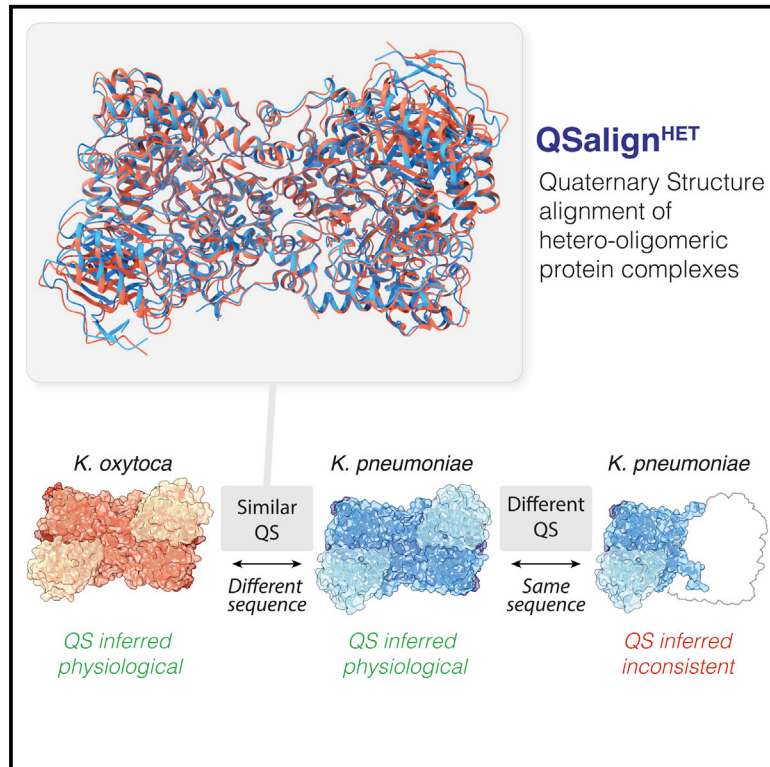

### Authors

Sucharita Dey, Emmanuel D. Levy

### Correspondence

sdey@iitj.ac.in (S.D.),  
emmanuel.levy@weizmann.ac.il (E.D.L.)

### In brief

The quaternary structure (QS) that a protein adopts in the cell is difficult to determine experimentally. Dey et al. report an automated approach based on the evolutionary conservation of the QS, which analyzes crystallographic data of hetero-oligomeric complexes and identifies their physiologically relevant QS with great accuracy.

### Highlights

- QSalignt<sup>HET</sup> compares the quaternary structure (QS) of hetero-oligomeric complexes
- QS conservation of a complex reliably predicts its physiological relevance
- QSalignt<sup>HET</sup> annotates ~50% of hetero-oligomers in PDB at an error rate of ~6%
- We introduce a manually curated benchmark dataset of hetero-oligomeric structures

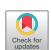

## Resource

# PDB-wide identification of physiological hetero-oligomeric assemblies based on conserved quaternary structure geometry

Sucharita Dey<sup>1,2,\*</sup> and Emmanuel D. Levy<sup>1,3,\*</sup><sup>1</sup>Department of Structural Biology, Weizmann Institute of Science, Rehovot 7610001, Israel<sup>2</sup>Present address: Department of Bioscience and Bioengineering, Indian Institute of Technology Jodhpur, Karwar-342037, Rajasthan, India<sup>3</sup>Lead contact\*Correspondence: [sdey@iitj.ac.in](mailto:sdey@iitj.ac.in) (S.D.), [emmanuel.levy@weizmann.ac.il](mailto:emmanuel.levy@weizmann.ac.il) (E.D.L.)<https://doi.org/10.1016/j.str.2021.07.012>

## SUMMARY

An accurate understanding of biomolecular mechanisms and diseases requires information on protein quaternary structure (QS). A critical challenge in inferring QS information from crystallography data is distinguishing biological interfaces from fortuitous crystal-packing contacts. Here, we employ QS conservation across homologs to infer the biological relevance of hetero-oligomers. We compare the structures and compositions of hetero-oligomers, which allow us to annotate 7,810 complexes as physiologically relevant, 1,060 as likely errors, and 1,432 with comparative information on subunit stoichiometry and composition. Excluding immunoglobulins, these annotations encompass over 51% of hetero-oligomers in the PDB. We curate a dataset of 577 hetero-oligomeric complexes to benchmark these annotations, which reveals an accuracy >94%. When homology information is not available, we compare QS across repositories (PDB, PISA, and EPPIC) to derive confidence estimates. This work provides high-quality annotations along with a large benchmark dataset of hetero-assemblies.

## INTRODUCTION

In the crowded environment of living cells, proteins and other biomolecules continuously interact with each other, forming multi-component complexes. The Protein Data Bank (PDB [Armstrong et al., 2020; Berman et al., 2000]) contains structural information about such complexes, of which a large fraction was solved by X-ray crystallography. However, quaternary structure (QS) information is not readily available from crystallography data because biological contacts between subunits need to be distinguished from crystal lattice contacts.

Interactions mediated by biological and crystal contacts are known to differ in interface size, amino acid composition, and evolutionary sequence conservation (Bahadur et al., 2003; Elcock and McCammon, 2001; Conte et al., 1999; Janin and Rodier, 1995; Chothia and Janin, 1975). Several methods have relied on these properties to discriminate between both types of interfaces, including CFPscore, EPPIC, PreBI, and COMP (Duarte et al., 2012; Liu et al., 2006; Tsuchiya et al., 2006, 2008). Other knowledge-based potentials, including information on *B* factor and inter-atomic distances, were used in PITA and CFPscore (Liu et al., 2006, 2014; Ponstingl et al., 2003). Alternatively, PISA (Krissinel and Henrick, 2007) and CLusPro (Yueh et al., 2017) have used an energy-based score for predictions. Several works also combined multiple features in machine-learning classifiers, as implemented in Dimovo, IPAC, IchemPic, NOXclass, RPAIAnalyst, PRODIGY-CRYSTAL, or PIACO (Bernauer et al., 2008; Fukasawa and Tomii, 2019; Hu et al., 2018; Jiménez-Gar-

cía et al., 2019; Mitra and Pal, 2011; Silva et al., 2015; Zhu et al., 2006). ProtCID has taken another approach by searching interfaces observed across multiple crystal forms of a protein or its homologs (Xu and Dunbrack, 2020; Xu et al., 2008).

While numerous methods and resources discriminate crystal interfaces from physiologically relevant interfaces, as recently reviewed (Capitani et al., 2016; Dey and Levy, 2018; Elez et al., 2020; Xu and Dunbrack, 2019), it is noteworthy that only a few methods make predictions on the whole protein assembly. PQS first addressed this challenge (Henrick and Thornton, 1998), and currently, the primary such resources are PISA (Krissinel and Henrick, 2007), EPPIC (Bliven et al., 2018), and QSalign (Dey et al., 2018). The latter relies on evolutionary conservation of QS geometry, which was a powerful means to distinguish between crystal lattice and physiological interfaces. Indeed, the method reached a high accuracy, superior to 95% (Dey et al., 2018). Although QSalign was limited to annotating homo-oligomers, the strategy applies to hetero-oligomers as well. However, comparing hetero-oligomers is more complicated than comparing homo-oligomers for several reasons now described.

Previous works involving the comparison of hetero-oligomeric complexes were aimed at measuring their similarity for the purpose of data mining (Berman et al., 2000; Madej et al., 2014) and classification, e.g., for generating non-redundant sets (Bertoni and Aloy, 2018; Koike and Ota, 2012; Levy et al., 2006; Mukherjee and Zhang, 2009; Sippl and Wiederstein, 2012). Here, we carry out such comparisons and integrate their results to evaluate the physiological relevance of a QS. We developed

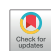

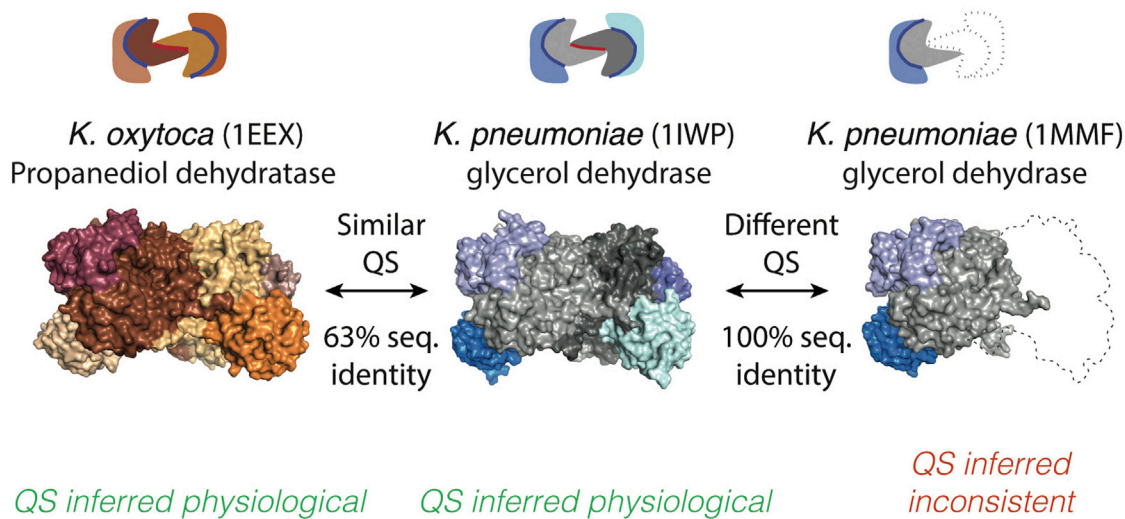

**Figure 1. Principle of QSalig<sup>HET</sup> to annotate the physiological relevance of hetero-oligomeric protein quaternary structures**

Hydroxynitrile lyase is a heterohexameric enzyme in *Klebsiella oxytoca* (PDB: 1EEX). A glycerol dehydratase from *Klebsiella pneumoniae* shows a similar quaternary structure (PDB: 1IWP, TM-score 0.9, root-mean-square deviation 1.14 Å), although they share 63% sequence identity on average. Such conservation suggests that the quaternary structure (QS) of both of these hexamers is physiologically relevant. This information enables inferring that the QS of a different entry (PDB: 1MMF), which shares 100% sequence identity with 1IWP, may have missing subunits.

QSalig<sup>HET</sup>, which analyzes hetero-oligomers with conserved QS geometry. It is noteworthy that comparing the QS of hetero-oligomers raises several challenges that are absent when analyzing homo-oligomers. First, point group symmetries of homo-oligomers mean that different QS states (e.g., monomer versus dimer or dimer versus tetramer) necessarily yield low structural similarity scores. In contrast, different QSs may show high overall structural similarity among hetero-oligomers, e.g., if the difference in structure comes from a subunit that is small relative to other subunits. Second, homo-oligomers composition can be compared readily using a single sequence alignment. In contrast, hetero-oligomers contain multiple gene products so that composition heterogeneity must be considered. Third, the availability of manually curated datasets of physiologically relevant hetero-oligomers for benchmarking purposes is limited. Indeed, the atomic coordinates of two previously published datasets (Chakrabarti and Janin, 2002; Ponstingl et al., 2003) are not available. Other resources such as Docking Benchmark 5 (Vreven et al., 2015) and DOCKGROUND (Kundrotas et al., 2018) provide coordinates for 230 and 396 non-redundant complexes, respectively, but due to their intended use these complexes consist mainly of heterodimers with few larger complexes and no very large assemblies such as the proteasome (Lowe et al., 1995).

In this work, we tackled these challenges. We compared the structure and composition of hetero-oligomers across the PDB and integrated the comparisons with a framework we call QSalig<sup>HET</sup>. Using QSalig<sup>HET</sup>, we annotated 10,302 hetero-oligomeric QSs. Among these, we validated 7,810 complexes and identified 1,060 requiring a possible correction. We annotated an additional 1,432 complexes with a different set of relationships, such as the inclusion of a complex into another. To assess the performance of QSalig<sup>HET</sup>, we curated a benchmark dataset encompassing 577 non-redundant (2,337 total) structures

(Table S1). Using this dataset, we benchmarked QSalig<sup>HET</sup> and subsequently derived confidence estimates across the PDB based on the consensus of PISA, EPPIC, and QSalig<sup>HET</sup> predictions.

## RESULTS AND DISCUSSION

### Comparing the structure of hetero-oligomeric assemblies to infer their physiological relevance

The evolutionary conservation of a QS is a powerful means to assess its physiological relevance. Indeed, we previously employed this concept to annotate homo-oligomeric structures in the PDB (Dey et al., 2018). Theoretically, the same principle of QS geometry conservation (Figure 1) can be used to annotate hetero-oligomeric proteins, but this requires more sophisticated comparisons. For example, calculating the similarity between two homo-oligomers involves comparing two sequences only. In contrast, to compare hetero-oligomers we must first establish subunit-subunit correspondences.

Therefore, we initially compared the subunit composition of complexes sharing at least one chain with the same domain architecture as defined by PFAM (El-Gebali et al., 2019) or ECOD (Schaeffer et al., 2017), yielding a table containing 40 million pairs of complexes (see STAR Methods). For each pair, we recorded chain-chain correspondences, minimum, maximum, and average sequence identities between matching chains, as well as information on missing subunits between the query and the target complexes.

We then carried out structural superpositions using a heuristic based on Kpax (Ritchie, 2016) as we did with homo-oligomers. From each superposition, we recorded the structural similarity between QSs (TM-score) as well as local TM-scores for individual chains. To annotate physiologically relevant assemblies, we used complex pairs where all subunits of the query existed in

the target and showed less than 80% average sequence identity. We first searched for structurally similar homologs of the largest oligomeric form of each complex, so we processed query complexes by decreasing number of subunits. We identified pairs of homologous complexes where all subunits matched both at the sequence and structural level. Such pairs showed conservation of QS, and we therefore annotated them as physiologically relevant (Figure 1). We optimized the structural similarity cut-off to be used in this process, as described later in the section “[benchmarking annotations of QSalig<sup>HET</sup>](#).”

Structures annotated as being physiologically relevant were subsequently used as starting points to predict inconsistent assemblies by transitivity. In other words, if two complexes show an identical composition and a different structure (e.g., PDB: 1IWP, 1MMF, Figure 1) and if we know that one of the structures is physiologically relevant (here 1IWP), we inferred that the other structure was inconsistent (e.g., 1MMF may have missing subunits). Our strategy assumes that the largest conserved QS is correct. Importantly, in certain cases, different QSs can co-exist in cells. For example, Allophycocyanins (PDB: 1ALL, 1KN1) are found as heterodimers, hetero-hexamers with A3B3 stoichiometry, and heterododecamers with A6B6 stoichiometry depending on solvent, pH, and protein concentration (Brejc et al., 1995; Liu et al., 1999). In such a case, the lower stoichiometry forms of this complex (AB and A3B3) would be deemed inconsistent by QSalig<sup>HET</sup> unless homologs with matching stoichiometries are also identified.

### Relationship types between structurally similar complexes

In the previous section, we saw two types of relationships between protein complexes: equivalence in composition and structure (PDB: 1EEX, 1IWP) and equivalence in composition with different structures (PDB: 1IWP, 1MMX). We observed several additional types of relationships, which we summarize in Table S2 and Figure 2.

Overall, we annotated 10,302 biological assemblies from the PDB, of which 7,810 QSs were predicted “Physiologically relevant (#1)” (Table S2). We corrected the QS annotation of 1,060 assemblies owing to the presence of structurally similar homologs that are either of higher stoichiometry or show different conserved interfaces; these are likely errors and were tagged as “Sub-stoichiometry (#2),” “Crystal interface (#3),” and “Crystal interface or large conformational change (#6).” Also, there were 84, 989, 96, and 263 assemblies in categories assumed to be either probable errors or inconclusive. These were tagged, respectively, “Sub-composition (#4),” “Excessive stoichiometry (#5),” “Crystal interface or large conformational change (#7),” and “Ambiguous (#8, #9).” We provide one concrete example for each category of annotation and the number of entries corresponding to the category (Figure 2 and Table S2).

### Manually curating a dataset of physiologically relevant hetero-oligomers

We manually curated a total of 2,337 hetero-oligomeric assemblies, corresponding to 577 non-redundant complexes at a cut-off of 90% sequence identity. Based on literature evidence, each assembly was annotated as being physiologically relevant (1,486 and 293 high and medium confidence, respectively), erro-

neous (259 and 159 high and medium confidence, respectively), or undefined (140 assemblies). The process of curation is described in STAR Methods. In brief, we searched the primary reference of the query structure for experimental evidence supporting the corresponding QS. If no evidence was found, we searched the primary references of similar structures (>97% sequence identity). In some cases, subunit annotation from Swiss-Prot and the latest Affinity and Docking Benchmark (UniProt Consortium, 2018; Vreven et al., 2015) were used. In the process, high-confidence cases were supported by experimental evidence. For example, the 2:1 trimeric complex of NGF-p75 (PDB: 1SG1) is supported by gel filtration, multi-angle light scattering, and isothermal titration calorimetry (He and Garcia, 2004). Annotations with medium confidence reflected cases such as the complex of Nuclear transport factor 2 and the Ras-family GTPase Ran (PDB: 5BXQ) for which the authors are confident about a particular QS (e.g., A2B2), although no direct experimental evidence is provided. We incorporated these annotations into the PiQSi web server. We call this curated dataset of hetero-oligomers PiQSi<sup>HET</sup> and use it to benchmark the predictions of QSalig<sup>HET</sup>.

### Benchmarking annotations of QSalig<sup>HET</sup>

We scanned a range of cut-off values of the TM-score used to infer QS geometry conservation, from 0.4 to 0.9. We ran the annotation pipeline for each value and benchmarked the resulting annotations based on the manually curated dataset PiQSi<sup>HET</sup> (Figure 3A). The number of entries used from the benchmark dataset (203 positives and 79 negatives) was lower than the total (577 entries), as curated entries without homologs were not annotated by QSalig<sup>HET</sup>. We found the error rate in confirming “physiological assemblies” to be largely independent of the TM-score cut-off used to infer QS conservation (Figure 3B). This independence exists because we compare complexes with matching composition and only a small fraction of these pairs have a low TM-score (Figure S1). However, the number of annotated structures decreased for TM-scores above 0.6; thus, we used this value. Overall, we validated 7,810 assemblies from the PDB with an estimated error rate of 4.4% (Figure 3B). Subsequently, we used these validated assemblies to correct annotations where the protein complex is identical but the QS is different. Several scenarios were possible, as depicted in Figure 2. We only benchmarked the categories “Crystal interface (#2),” “Sub-stoichiometry (#3),” and “Crystal interface or large conformational change (#6),” as the others are either not errors (e.g., sub-composition), are unclear (e.g., excessive stoichiometry, ambiguous), or might originate in large conformational changes. Overall, we were able to correct the annotations of 1,060 assemblies with an error rate estimated at 10.2% (Figure 3).

Next, we compared the performance of QSalig<sup>HET</sup> with two state-of-the-art methods for QS annotation, PISA and EPPIC. Using PiQSi<sup>HET</sup> as a benchmark dataset, we found that PISA and EPPIC predict heterodimers with an error rate of 25% and 33%, respectively. At the same time, conservation of QS geometry appeared reliable on the same structures, with an error rate of 6%. The performance of predictions decreased further for larger hetero-oligomers, with error rates equal to 39% and 45% for PISA and EPPIC, respectively (Figure S2). This increased error

| Species 1<br><i>QS inferred physiological</i>                                                                                                        | Species 2<br><i>QS inferred physiological</i>                                                                                                         | Species 2<br><i>Possible QS inconsistency</i>                                                                          | Annotation                                                                         |
|------------------------------------------------------------------------------------------------------------------------------------------------------|-------------------------------------------------------------------------------------------------------------------------------------------------------|------------------------------------------------------------------------------------------------------------------------|------------------------------------------------------------------------------------|
| <p style="text-align: center;">Different sequence similar structure    Same sequence, dissimilar structure</p>                                       |                                                                                                                                                       |                                                                                                                        |                                                                                    |
| 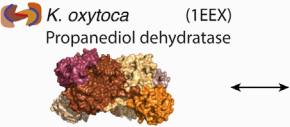 <p><i>K. oxytoca</i> (1EEX)<br/>Propanediol dehydratase</p>        |  <p><i>K. pneumoniae</i>(1IWP)<br/>Glycerol dehydratase</p>          |                                                                                                                        | <p><i>Physiologically relevant</i><br/>#1 (7,810 QS)</p>                           |
|  <p><i>H. sapiens</i> (1G3N)<br/>CDK6-CDKN2C/p18-INK4c</p>          |  <p><i>H. sapiens</i> (1B18 PISA)<br/>CDK6-CDKN2D/p19-INK4d</p>      |  <p><i>H. sapiens</i> (1B18 PDB)</p> | <p><i>Crystal interface</i> #2<br/>(260 QS)</p>                                    |
|  <p><i>K. oxytoca</i> (1EEX)<br/>Propanediol dehydratase</p>        |  <p><i>K. pneumoniae</i>(1IWP)<br/>Glycerol dehydratase</p>          |  <p><i>K. pneumoniae</i>(1MMF)</p>   | <p><i>Sub-stoichiometry</i> #3<br/>(523 QS)</p>                                    |
|  <p><i>C. immitis</i> (5B8I)<br/>Calcineurin A/B, FKBP12</p>       |  <p><i>B. taurus</i> (1TCO)<br/>Calcineurin A/B, FKBP12</p>         |  <p><i>H. sapiens</i> (1AUJ)</p>    | <p><i>Sub-composition</i> #4<br/>(84 QS)</p>                                       |
|  <p><i>S. scrofa</i> (3UOU)<br/>Hydrolase-hydrolase inhibitor</p> |  <p><i>H. sapiens</i> (3P95)<br/>Mesotrypsin-trypsin inhibitor</p> |  <p><i>H. sapiens</i> (2R9P)</p>   | <p><i>Excessive-stoichiometry</i><br/>#5 (989 QS)</p>                              |
|  <p><i>Pseudomonas sp.</i>(3RNE)<br/>touA-touE</p>                |  <p><i>P. mendocina</i> (5TDS)<br/>tmoA-tmoE</p>                   |  <p><i>P. mendocina</i> (3DHH)</p> | <p><i>Crystal interface</i><br/>or large conformational<br/>change #6 (277 QS)</p> |
|  <p><i>F. tularensis.</i> (6MGG PISA)<br/>sucC-sucD</p>           |  <p><i>E. coli</i> (1JLL)<br/>sucC-sucD</p>                        |  <p><i>E. coli</i> (1SCU)</p>      | <p><i>Crystal interface</i><br/>or large conformational<br/>change #7 (96 QS)</p>  |

**Figure 2. Examples of assemblies for different types of annotation made by QSalig<sup>HET</sup>**

Annotations are based on the structural similarity of the QS as well as the similarity in subunit number and composition. The number of structures with each annotation type is given in parentheses. A comprehensive description of annotation types is provided in [STAR Methods](#) and [Table S2](#). In brief, Annotation #1 describes complexes where two homologous assemblies share the same interaction geometry, i.e., their QS is conserved. Annotation #2 is assigned when PDB and PISA QSs are different for the query and the PISA QS is supported by structural conservation, so the query PDB is annotated as incorrect. Annotation #3 arises when two complexes have the same composition but subunits are in lower stoichiometry, and Annotation #4 is assigned when one complex is included in the other and there exists a difference in composition. Annotation #5 is the opposite of Annotation #3: it is assigned to a complex when it shares the same composition as another validated complex and shows a higher subunit stoichiometry not found in homologs. Annotation #6 arises when a complex includes another one and shows structural differences, hinting at a possible crystal interface or a conformational change. Here, the difference in composition/stoichiometry may be associated with the structural differences detected. Annotation #7 is assigned when the composition and the number of subunits are the same between the two complexes although they are not structurally similar.

rate is likely due to both methods making independent predictions for different interfaces within an assembly. Thus, larger complexes require more interfaces to be predicted correctly together for the whole assembly to be predicted correctly. In

contrast, QSalig<sup>HET</sup> compares the QS conservation of entire complexes rather than individual interfaces. As a result, the accuracy of the predictions is not negatively affected by the size of the complex. Indeed, the error of QSalig<sup>HET</sup> was equal to 6% for

**A** Benchmark dataset on which the predictions were validated

|                     |            |
|---------------------|------------|
| Number of positives | 203 (1271) |
| Number of negatives | 79 (307)   |

**B** Different sequences

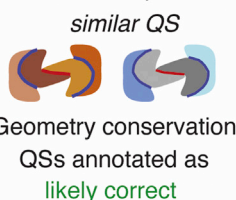

**C** Same sequence

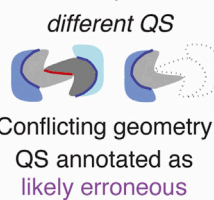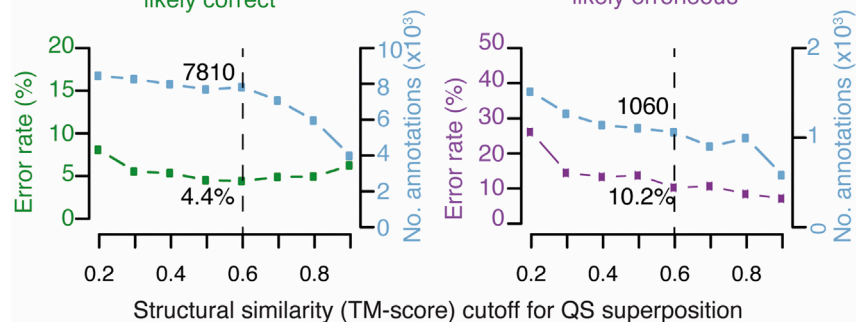

those larger complexes as well (i.e., with three or more subunits). The results of the benchmark are shown in Figure 4 for all complexes and in Figure S2 for dimers and larger complexes separately. Examples of prediction differences across methods and cases in which QSalig<sup>HET</sup> fails are illustrated in Figure 5.

**QSBio combines predictors to infer confidence estimates on a PDB-wide scale**

QSalig<sup>HET</sup> annotated ~51% of hetero-oligomers in the PDB. To increase coverage, we combined annotations from PISA and EPPIC for consensus-based predictions, as was done previously for homo-oligomers (Dey et al., 2018). We derived weighted scores and estimated error probabilities for each assembly as follows: for entries where the annotation is available from all three sources (QSalig<sup>HET</sup>, PISA, EPPIC), a weighted score is derived from all three. Otherwise, the score is derived from the combined predictions of PISA and EPPIC only. In this way, we could annotate all hetero-oligomeric assemblies in the PDB. The integration allows us to obtain a consensus prediction of high or low confidence depending on the agreement between methods (Figure 4A). We benchmarked the individual methods and their combination using PiQSi<sup>HET</sup>. Considering dimers and oligomers together, the areas under the curve (AUCs) are 0.71, 0.61, 0.73, 0.92, and 0.93 for PISA, EPPIC, PISA + EPPIC, QSalig<sup>HET</sup>, and QSBio, respectively. QSalig<sup>HET</sup> alone performs well, and integrating PISA and EPPIC in a “consensus prediction” approach improved the AUC moderately, by 0.01. The combination of PISA and EPPIC does not increase the AUC significantly relative to PISA alone but yields conservative predictions with a false-positive rate twice as low as when using PISA alone. This improvement comes at the cost of lower sensitivity, with the true-positive rate decreasing. However, such a compromise

**Figure 3. TM-score optimization and benchmark of predictions**

(A) Number of non-redundant structures in the manually curated benchmark dataset. Positives are correct structures and negatives are likely errors. The number of redundant structures is given in parentheses.

(B) The structural similarity score (TM-score) cut-off determines the minimum value at which two QSs are considered conserved and thereby inferred “physiologically relevant.” We scanned different TM-score cut-offs, calculated the error rate (green line), and recorded the total number of QSs annotated (blue line) for each.

(C) Starting from validated QSs, QSalig<sup>HET</sup> then searches for conflicting QSs that have identical composition and different structures (i.e., TM-score below the cut-off). We annotated such cases as likely errors and show the accuracy of these predictions (purple line) as well as the number of structures annotated for different cut-off values (light blue).

would be desirable if one’s goal is to gather a high-confidence set of hetero-oligomers. In these analyses, we benchmarked PISA and EPPIC on the subset of structures also annotated by QSalig<sup>HET</sup>. The results

do not change significantly when adding structures of the benchmark not annotated by QSalig<sup>HET</sup> (Figure S3).

QSBio provides error estimates to each assembly, and we grouped them into five classes of confidence (very high, high, medium, low, very low) depending on estimated error probabilities based on the benchmark and corresponding to 0%–2%, 2%–5%, 5%–15%, 15%–50%, and 50%–100%, respectively. The number of assemblies in each class is 3,626, 1,541, 5,759, 8,094, and 1,060, respectively (Table S5). The PDB provides multiple biological assemblies for about 30% of its entries (Xu and Dunbrack, 2019), so QSBio is useful in providing error estimates for each assembly, enabling end-users to choose the highest-confidence assemblies for analysis.

**Conclusion**

For structures solved by X-ray crystallography, the coordinates of the asymmetric unit (ASU) are deposited in the PDB for all entries. However, information about the physiological assembly is not always provided by the authors. The ASU is the physiological assembly for only about 40% of structures deposited (Xu and Dunbrack, 2019). Therefore, methods are needed to identify such assemblies. Here we showed that conservation of QS geometry provides reliable information for prediction of the physiological relevance of hetero-oligomeric complexes in X-ray crystallography data. We used this information in an automated strategy called QSalig<sup>HET</sup> and annotated 51% of hetero-oligomeric structures across the PDB. To assess the accuracy of our predictions, we manually curated a dataset of hetero-oligomers. The benchmark with this dataset showed that annotations inferred by QSalig<sup>HET</sup> were largely accurate. Finally, we integrated annotations from EPPIC and PISA to infer a confidence estimate for hetero-oligomeric complexes not covered by QSalig<sup>HET</sup>. We

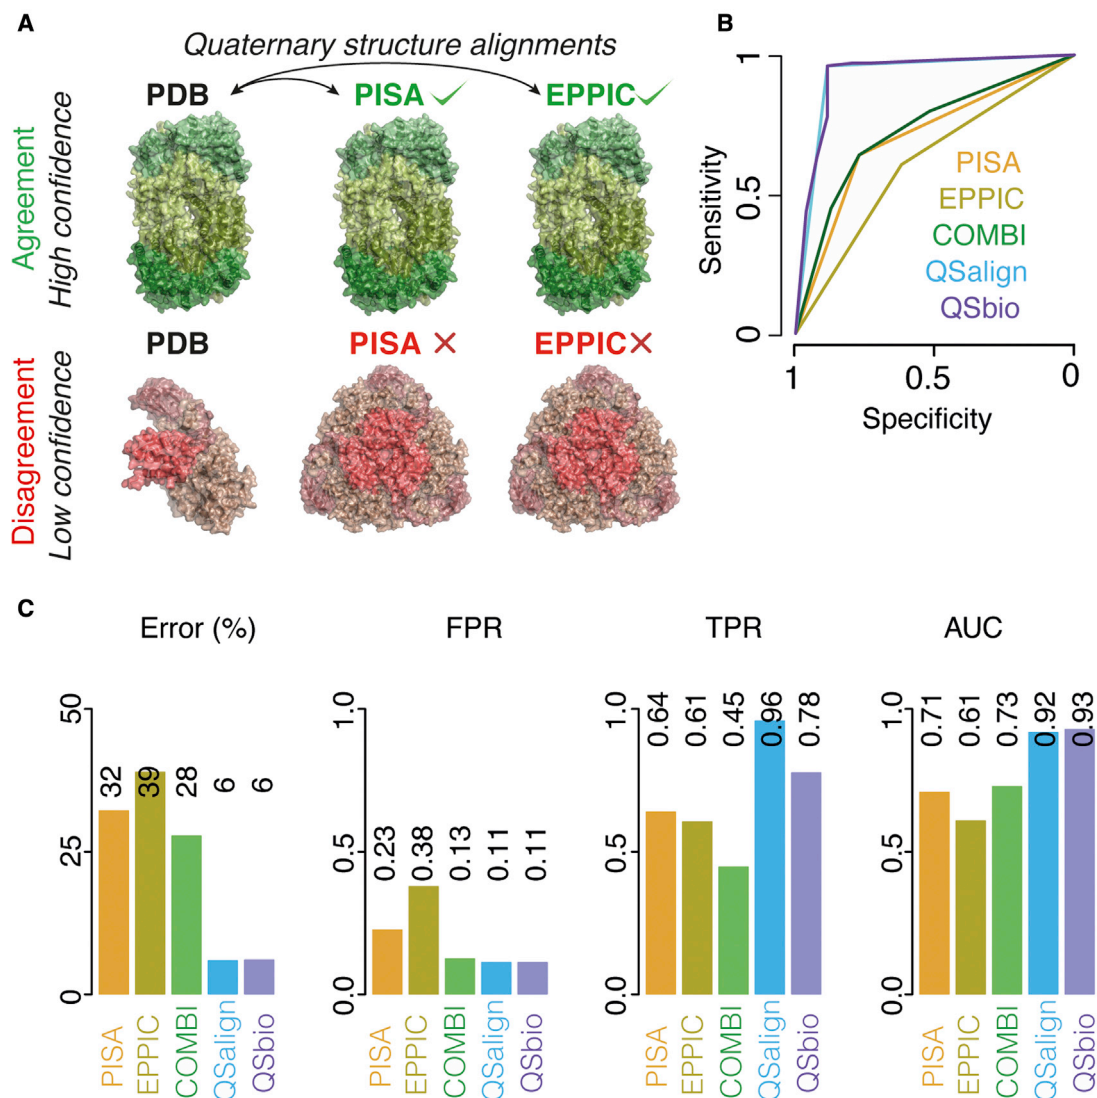

**Figure 4. Principle and benchmark of QSbio**

(A) The integration of QSalgn<sup>HET</sup>, PISA, and EPPIC is carried out by comparing the structure of predicted assemblies. Consensus between methods increases the confidence in a particular assembly (e.g., PDB: 3U7Q in the top row), whereas disagreement between methods yields lower confidence (e.g., PDB: 4UBP in the lower row).

(B) Benchmarking the individual methods and their combination into QSbio. Receiver-operating characteristic curves show the area under the curve for all assemblies together (dimers and higher-order oligomers).

(C) Statistics derived from the benchmark: FPR, false-positive rate; TPR, true-positive rate; AUC, area under the curve. We provide detailed information on the benchmark in Table S3. The number of true positives, false negatives, true negatives, and false positives for each method are provided in Table S4.

hope that these annotations will help the scientific community to focus on physiologically relevant complexes when carrying out global analyses of hetero-oligomers in the PDB.

### STAR★METHODS

Detailed methods are provided in the online version of this paper and include the following:

- KEY RESOURCES TABLE
- RESOURCE AVAILABILITY
  - Lead contact

- Materials availability
- Data and code availability
- EXPERIMENTAL MODEL AND SUBJECT DETAILS
- METHOD DETAILS
  - Dataset
  - Hetero-oligomer Benchmark dataset
  - Comparing the composition of hetero-oligomers
  - Structure comparison
  - Annotation procedure
  - Benchmarking predictions
  - Integrating QS information into QSbio
- QUANTIFICATION AND STATISTICAL ANALYSIS

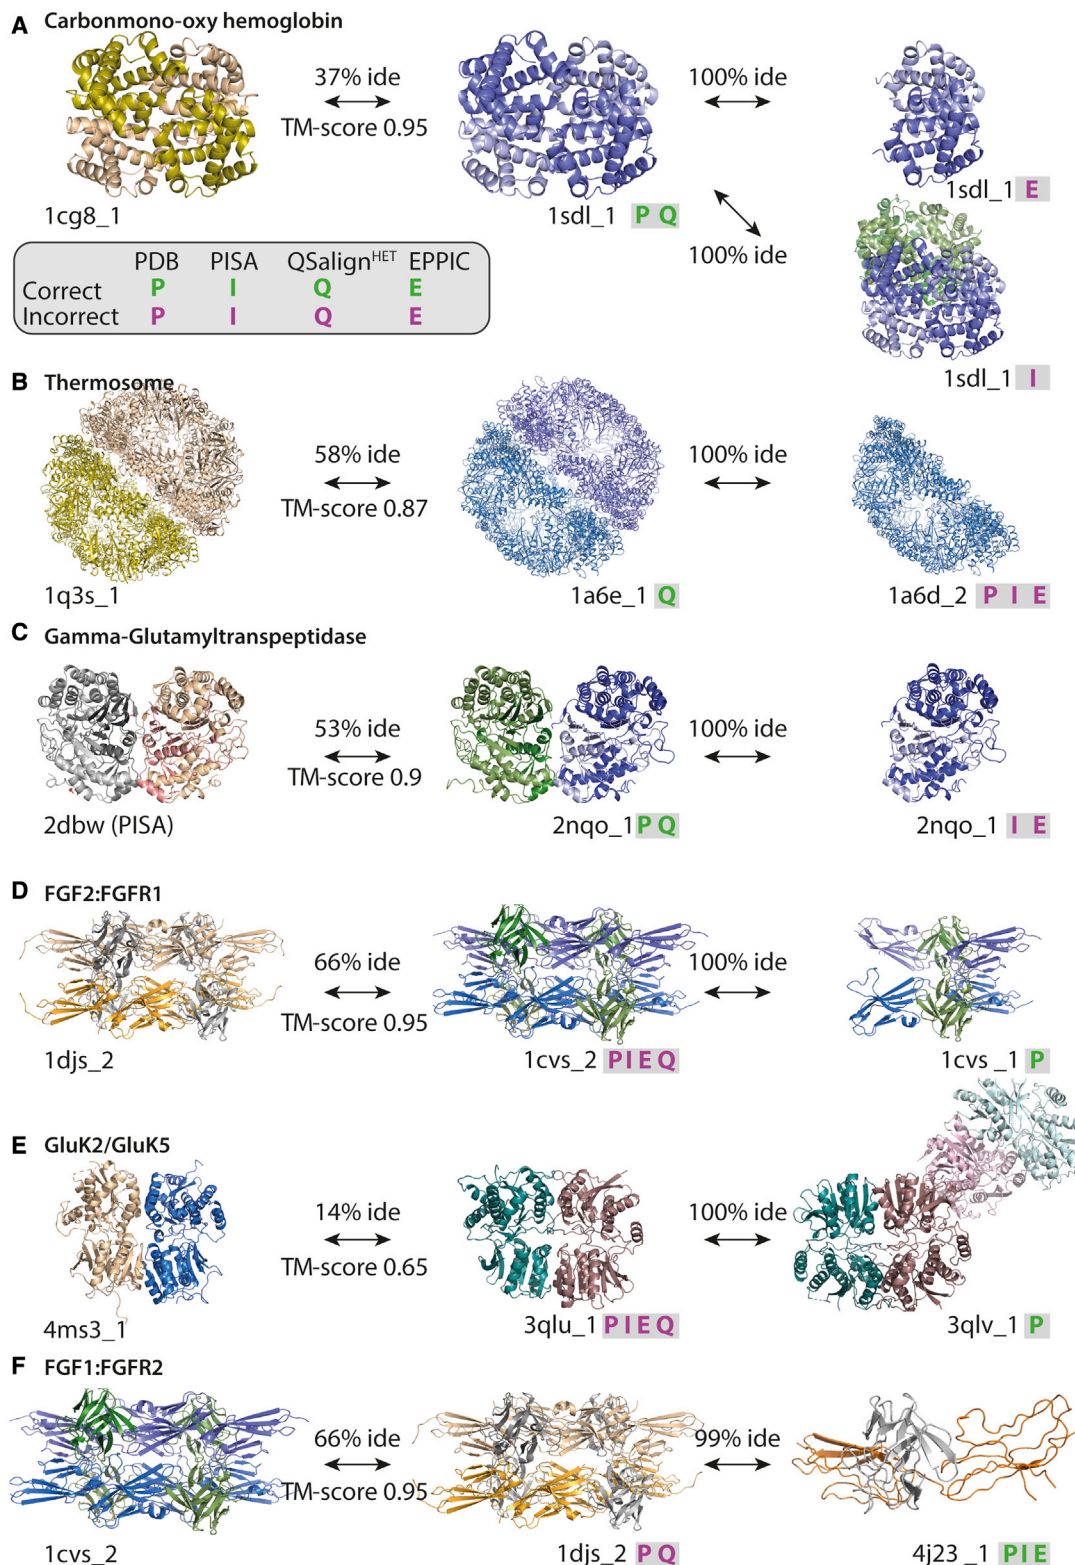

**Figure 5. Examples of prediction differences across methods**

(A) EPPIC predicts human hemoglobin to be a dimer and PISA predicts it to be an octamer, whereas the conservation of the tetramer yields a correct annotation by QSalgn<sup>HET</sup>.

(B) EPPIC and PISA predict half of the thermosome to be the physiologically relevant assembly, likely due to the inter-ring interface being small. However, the conservation of the two-ring structure is detected and yields a correct annotation with QSalgn<sup>HET</sup>.

(legend continued on next page)



## SUPPLEMENTAL INFORMATION

Supplemental information can be found online at <https://doi.org/10.1016/j.str.2021.07.012>.

## ACKNOWLEDGMENTS

We thank David Ritchie for his help with Kpax and Harry Greenblatt for helping with the computer infrastructure. This work was supported by the Israel Science Foundation (grant no. 1452/18), by the European Research Council under the European Union Horizon 2020 research and innovation program (grant agreement no. 819318), by a research grant from A.-M. Boucher, by research grants from the Estelle Funk Foundation, the Estate of Fannie Sherr, the Estate of Albert Delighter, the Merle S. Cahn Foundation, Mrs. Mildred S. Gosden, the Estate of Elizabeth Wachsmann, and the Arnold Bortman Family Foundation. E.D.L. is incumbent of the Recanati Career Development Chair of Cancer Research. S.D. received support from the Koshland Foundation.

## AUTHOR CONTRIBUTIONS

S.D. and E.D.L. designed the experiments. S.D. performed the experiments. S.D. and E.D.L. wrote the manuscript.

## DECLARATION OF INTERESTS

The authors declare no competing interests.

Received: September 15, 2020

Revised: March 22, 2021

Accepted: July 23, 2021

Published: September 13, 2021

## REFERENCES

Armstrong, D.R., Berrisford, J.M., Conroy, M.J., Gutmanas, A., Anyango, S., Choudhary, P., Clark, A.R., Dana, J.M., Deshpande, M., Dunlop, R., et al. (2020). PDB: improved findability of macromolecular structure data in the PDB. *Nucleic Acids Res.* **48**, D335–D343.

Bahadur, R.P., Chakrabarti, P., Rodier, F., and Janin, J. (2003). Dissecting subunit interfaces in homodimeric proteins. *Proteins* **53**, 708–719.

Berman, H.M., Westbrook, J., Feng, Z., Gilliland, G., Bhat, T.N., Weissig, H., Shindyalov, I.N., and Bourne, P.E. (2000). The Protein Data Bank. *Nucleic Acids Res.* **28**, 235–242.

Bernaer, J., Bahadur, R.P., Rodier, F., Janin, J., and Poupon, A. (2008). DiMoVo: a Voronoi tessellation-based method for discriminating crystallographic and biological protein-protein interactions. *Bioinformatics* **24**, 652–658.

Bertoni, M., and Aloy, P. (2018). DynBench3D, a web-resource to dynamically generate benchmark sets of large heteromeric protein complexes. *J. Mol. Biol.* **430**, 4431–4438.

Bliven, S., Lafita, A., Parker, A., Capitani, G., and Duarte, J.M. (2018). Automated evaluation of quaternary structures from protein crystals. *PLoS Comput. Biol.* **14**, e1006104.

Brejč, K., Ficner, R., Huber, R., and Steinbacher, S. (1995). Isolation, crystallization, crystal structure analysis and refinement of allophycocyanin from the

cyanobacterium *Spirulina platensis* at 2.3 Å resolution. *J. Mol. Biol.* **249**, 424–440.

Capitani, G., Duarte, J.M., Baskaran, K., Bliven, S., and Somody, J.C. (2016). Understanding the fabric of protein crystals: computational classification of biological interfaces and crystal contacts. *Bioinformatics* **32**, 481–489.

Chakrabarti, P., and Janin, J. (2002). Dissecting protein-protein recognition sites. *Proteins* **47**, 334–343.

Chothia, C., and Janin, J. (1975). Principles of protein-protein recognition. *Nature* **256**, 705–708.

Lo Conte, L., Chothia, C., and Janin, J. (1999). The atomic structure of protein-protein recognition sites. *J. Mol. Biol.* **285**, 2177–2198.

Dey, S., and Levy, E.D. (2018). Inferring and using protein quaternary structure information from crystallographic data. In *Protein Complex Assembly: Methods and Protocols*, J.A. Marsh, ed. (Springer), pp. 357–375.

Dey, S., Ritchie, D.W., and Levy, E.D. (2018). PDB-wide identification of biological assemblies from conserved quaternary structure geometry. *Nat. Methods* **15**, 67–72.

Duarte, J.M., Srebnik, A., Schärer, M.A., and Capitani, G. (2012). Protein interface classification by evolutionary analysis. *BMC Bioinformatics* **13**, 334.

Elcock, A.H., and McCammon, J.A. (2001). Identification of protein oligomerization states by analysis of interface conservation. *Proc. Natl. Acad. Sci. U.S.A.* **98**, 2990–2994.

Elez, K., Bonvin, A.M.J.J., and Vangone, A. (2020). Biological versus crystallographic protein interfaces: an overview of computational approaches for their classification. *Crystals* **10**, 114.

El-Gebali, S., Mistry, J., Bateman, A., Eddy, S.R., Luciani, A., Potter, S.C., Qureshi, M., Richardson, L.J., Salazar, G.A., Smart, A., et al. (2019). The Pfam protein families database in 2019. *Nucleic Acids Res.* **47**, D427–D432.

Fukasawa, Y., and Tomii, K. (2019). Accurate classification of biological and non-biological interfaces in protein crystal structures using subtle covariation signals. *Sci. Rep.* **9**, 12603.

He, X.-L., and Garcia, K.C. (2004). Structure of nerve growth factor complexed with the shared neurotrophin receptor p75. *Science* **304**, 870–875.

Henrick, K., and Thornton, J.M. (1998). PQS: a protein quaternary structure file server. *Trends Biochem. Sci.* **23**, 358–361.

Hu, J., Liu, H.-F., Sun, J., Wang, J., and Liu, R. (2018). Integrating co-evolutionary signals and other properties of residue pairs to distinguish biological interfaces from crystal contacts. *Protein Sci.* **27**, 1723–1735.

Janin, J., and Rodier, F. (1995). Protein-protein interaction at crystal contacts. *Proteins* **23**, 580–587.

Jiménez-García, B., Elez, K., Koukos, P.I., Bonvin, A.M., and Vangone, A. (2019). PRODIGY-crystal: a web-tool for classification of biological interfaces in protein complexes. *Bioinformatics* **35**, 4821–4823.

Koike, R., and Ota, M. (2012). SCPC: a method to structurally compare protein complexes. *Bioinformatics* **28**, 324–330.

Krissinel, E., and Henrick, K. (2007). Inference of macromolecular assemblies from crystalline state. *J. Mol. Biol.* **372**, 774–797.

Kumar, J., Schuck, P., and Mayer, M.L. (2011). Structure and assembly mechanism for heteromeric kainate receptors. *Neuron* **71**, 319–331.

Kundrotas, P.J., Anishchenko, I., Dauzhenka, T., Kotthoff, I., Mnevets, D., Copeland, M.M., and Vakser, I.A. (2018). Dockground: a comprehensive data resource for modeling of protein complexes. *Protein Sci.* **27**, 172–181.

(C) PISA and EPPIC predict an  $\alpha\beta$  form for 2nqo instead of the  $\alpha_2\beta_2$  form.

(D) The octameric structure of FGF2-FGFR1 is predicted by all methods as the correct assembly. Nevertheless, this complex is described as a tetramer in the primary reference.

(E) The dimeric structure of GluK2/GluK5 is predicted by all methods to be physiologically relevant, but the primary reference (Kumar et al., 2011) describes tetramers in solution. Based on these experimental data and considering that the tetramer's interface is observed in seven crystal forms according to PROTCID (Xu and Dunbrack, 2020), we included the tetrameric form in the PiQSi<sup>HET</sup> benchmark dataset.

(F) The dimeric structure of FGF1:FGFR2 is predicted by all the methods except QSign<sup>HET</sup> to be physiologically relevant. However, its close homolog (99% identical) FGF2:FGFR1 has an octameric structure, and the octameric QS is found to be conserved. The octamer is observed in three crystal forms according to PROTCID.

- Levy, E.D. (2007). PiQSi: protein quaternary structure investigation. *Structure* 15, 1364–1367.
- Levy, E.D., Pereira-Leal, J.B., Chothia, C., and Teichmann, S.A. (2006). 3D complex: a structural classification of protein complexes. *PLoS Comput. Biol.* 2, e155.
- Liu, J.Y., Jiang, T., Zhang, J.P., and Liang, D.C. (1999). Crystal structure of allophycocyanin from red algae *Porphyra yezoensis* at 2.2-Å resolution. *J. Biol. Chem.* 274, 16945–16952.
- Liu, Q., Li, Z., and Li, J. (2014). Use B-factor related features for accurate classification between protein binding interfaces and crystal packing contacts. *BMC Bioinformatics* 15 (suppl. 16), S3.
- Liu, S., Li, Q., and Lai, L. (2006). A combinatorial score to distinguish biological and nonbiological protein-protein interfaces. *Proteins* 64, 68–78.
- Lowe, J., Stock, D., Jap, B., Zwickl, P., Baumeister, W., and Huber, R. (1995). Crystal structure of the 20S proteasome from the archaeon *T. acidophilum* at 3.4 Å resolution. *Science* 268, 533–539.
- Madej, T., Lanczycki, C.J., Zhang, D., Thiessen, P.A., Geer, R.C., Marchler-Bauer, A., and Bryant, S.H. (2014). MMDB and VAST+: tracking structural similarities between macromolecular complexes. *Nucleic Acids Res.* 42, D297–D303.
- Mitra, P., and Pal, D. (2011). Combining Bayes classification and point group symmetry under boolean framework for enhanced protein quaternary structure inference. *Structure* 19, 304–312.
- Mukherjee, S., and Zhang, Y. (2009). MM-align: a quick algorithm for aligning multiple-chain protein complex structures using iterative dynamic programming. *Nucleic Acids Res.* 37, e83.
- Ponstingl, H., Kabir, T., and Thornton, J.M. (2003). Automatic inference of protein quaternary structure from crystals. *J. Appl. Crystallogr.* 36, 1116–1122.
- Ritchie, D.W. (2016). Calculating and scoring high quality multiple flexible protein structure alignments. *Bioinformatics* 32, 2650–2658.
- Schaeffer, R.D., Liao, Y., Cheng, H., and Grishin, N.V. (2017). ECOD: new developments in the evolutionary classification of domains. *Nucleic Acids Res.* 45, D296–D302.
- Silva, F.D., Da Silva, F., Desaphy, J., Bret, G., and Rognan, D. (2015). IChemPIC: a random forest classifier of biological and crystallographic protein-protein interfaces. *J. Chem. Inf. Model.* 55, 2005–2014.
- Sippl, M.J., and Wiederstein, M. (2012). Detection of spatial correlations in protein structures and molecular complexes. *Structure* 20, 718–728.
- Tsuchiya, Y., Kinoshita, K., Ito, N., and Nakamura, H. (2006). PreBI: prediction of biological interfaces of proteins in crystals. *Nucleic Acids Res.* 34, W320–W324.
- Tsuchiya, Y., Nakamura, H., and Kinoshita, K. (2008). Discrimination between biological interfaces and crystal-packing contacts. *Adv. Appl. Bioinform. Chem.* 1, 99–113.
- UniProt Consortium, T. (2018). UniProt: the universal protein knowledgebase. *Nucleic Acids Res.* 46, 2699.
- Vreven, T., Moal, I.H., Vangone, A., Pierce, B.G., Kastiris, P.L., Torchala, M., Chaleil, R., Jiménez-García, B., Bates, P.A., Fernandez-Recio, J., et al. (2015). Updates to the integrated protein-protein interaction benchmarks: docking benchmark version 5 and affinity benchmark version 2. *J. Mol. Biol.* 427, 3031–3041.
- Xu, Q., and Dunbrack, R.L., Jr. (2019). Principles and characteristics of biological assemblies in experimentally determined protein structures. *Curr. Opin. Struct. Biol.* 55, 34–49.
- Xu, Q., and Dunbrack, R.L., Jr. (2020). ProtCID: a data resource for structural information on protein interactions. *Nat. Commun.* 11, 711.
- Xu, Q., Canutescu, A.A., Wang, G., Shapovalov, M., Obradovic, Z., and Dunbrack, R.L. (2008). Statistical analysis of interface similarity in crystals of homologous proteins. *J. Mol. Biol.* 381, 487–507.
- Yueh, C., Hall, D.R., Xia, B., Padhorny, D., Kozakov, D., and Vajda, S. (2017). ClusPro-DC: dimer classification by the cluspro server for protein-protein docking. *J. Mol. Biol.* 429, 372–381.
- Zhu, H., Domingues, F.S., Sommer, I., and Lengauer, T. (2006). NOXclass: prediction of protein-protein interaction types. *BMC Bioinformatics* 7, 27.

## STAR★METHODS

### KEY RESOURCES TABLE

| REAGENT or RESOURCE                                                                | SOURCE                      | IDENTIFIER                                                                                                                      |
|------------------------------------------------------------------------------------|-----------------------------|---------------------------------------------------------------------------------------------------------------------------------|
| <b>Deposited data</b>                                                              |                             |                                                                                                                                 |
| Annotations of hetero-oligomers                                                    | This manuscript             | <a href="http://www.piqsi.org">www.piqsi.org</a>                                                                                |
| PDB coordinate files of the manually curated benchmark dataset of hetero-oligomers | This manuscript             | <a href="https://doi.org/10.6084/m9.figshare.13801304">https://doi.org/10.6084/m9.figshare.13801304</a>                         |
| <b>Software and algorithms</b>                                                     |                             |                                                                                                                                 |
| 3DComplex                                                                          | Levy et al., 2006           | <a href="https://shmoo.weizmann.ac.il/elevy/3dcomplexV6/Entry.cgi">https://shmoo.weizmann.ac.il/elevy/3dcomplexV6/Entry.cgi</a> |
| PDB                                                                                | Berman et al., 2000         | <a href="https://www.rcsb.org">https://www.rcsb.org</a>                                                                         |
| PISA                                                                               | Krissinel and Henrick, 2007 | <a href="https://www.ebi.ac.uk/pdbe/pisa/">https://www.ebi.ac.uk/pdbe/pisa/</a>                                                 |
| EPPIC                                                                              | Duarte et al., 2012         | <a href="https://www.eppic-web.org/ewui/">https://www.eppic-web.org/ewui/</a>                                                   |
| KPAX                                                                               | Ritchie, 2016               | <a href="http://kpax.loria.fr/">http://kpax.loria.fr/</a>                                                                       |

### RESOURCE AVAILABILITY

#### Lead contact

Further information and requests for resources and code should be directed to and will be fulfilled by the lead contact, Emmanuel D Levy ([emmanuel.levy@weizmann.ac.il](mailto:emmanuel.levy@weizmann.ac.il)).

#### Materials availability

This study did not generate new unique reagents.

#### Data and code availability

PDB coordinate files of the manually curated benchmark dataset have been deposited on Figshare and are publicly available. DOIs are listed in the key resources table. All annotations are available in [supplementary information](#) and can be browsed on the PiQSi website ([www.piqsi.org](http://www.piqsi.org)). The pseudocode is available in this paper's [supplementary information](#) file ([Methods S1](#)). Any additional information required to reanalyze the data reported in this paper is available from the lead contact upon request.

### EXPERIMENTAL MODEL AND SUBJECT DETAILS

All data are generated from the datasets provided in the [key resources table](#).

### METHOD DETAILS

#### Dataset

The dataset of protein structures is based on 3DComplex (Levy et al., 2006) as of April 2017 and consists of 20,080 'biological assemblies' of hetero-oligomers defined by the Protein DataBank, excluding immunoglobulins. The dataset is available on the 3DComplex (version 6) website: <http://shmoo.weizmann.ac.il/elevy/3dcomplexV6/Home.cgi>.

For each structure, we use the top prediction from PISA (Krissinel and Henrick, 2007) as of April 2017, and EPPIC predictions of assemblies (Version 3) were downloaded using the REST API (json format) on October 17<sup>th</sup>, 2019 (Bliven et al., 2018).

#### Hetero-oligomer Benchmark dataset

Using the web interface of PiQSi (Levy, 2007), we manually annotated 2,337 (577 NR) structures of hetero-oligomers, of which 1779 (406 NR) are annotated as physiologically relevant, 418 (135 NR) are annotated as erroneous, and 140 (36 NR) as undefined as we found no clear evidence of a specific oligomeric state. To curate oligomeric state information, we searched the primary reference of a structure for keywords such as "oligomeric," "solution," "chromatography," "gel," "dynamic light," "monomer," "tetramer," "dimer," etc. The curation process took place in several steps. First, we focused on structures present in the docking benchmark dataset (Vreven et al., 2015) and searched their associated reference, yielding 212 annotated complexes. Next, we examined structures that are well known, such as tryptophan synthase or hemoglobin. Third, we curated complexes exhibiting different quaternary structure states according to our "composition similarity table" to identify potential errors. At this stage, the dataset contained about 300 structures. To increase the

size further, we went through a list of hetero-oligomers sharing no more than 30% average sequence identity across matched subunits and excluding antibodies. We curated complexes in this list until the benchmark dataset contained 485 and 577 structures at redundancy levels of 30% and 90% respectively, with a total of 2,337 structures when including all redundancies. The redundancy arose from an annotation transfer process. Once an entry was annotated, its annotation was transferred to close homologs sharing the same subunit composition and stoichiometry as well as a minimum of 95% sequence identity across all subunits. Furthermore, the transfer of annotations for all entries was manually verified to confirm that they correspond to the same protein complex. We call this manually curated benchmark dataset of hetero-oligomers PiQSi<sup>HET</sup>. For each curated entry, we provide the following information:

(i) The error status as “NO” (physiologically relevant structures with high confidence), “PROBNOT” (physiologically relevant structures with medium confidence), “YES” (erroneous structures with high confidence), “PROBYES” (erroneous structures with medium confidence) or “NA” (undefined), (ii) the symmetry and number of subunits for the original assembly and for the correct assembly, (iii) the PubMed identifier in which information was found for the annotation and (iv) a sentence that describes the annotation and supporting evidence from the literature.

### Comparing the composition of hetero-oligomers

The annotation process of QSalgn<sup>HET</sup> required comparing the composition of hetero-oligomers and homo-oligomers. We used sequence homology from 3DComplex and created a table with pairwise comparative information on hetero-oligomers sharing at least one subunit. For each pair, we computed chain-chain correspondences and recorded minimum, maximum and average sequence identities as well as “gaps,” if any. Correspondences between chains were established by comparing their sequences. For each chain in the query complex, we selected a matching chain in the target complex. The matching chain was the one with the highest sequence identity. Therefore, when complexes containing paralogs were compared such as hemoglobin, each chain was only matched once to its closest homolog ( $\alpha$  with  $\alpha$ ,  $\beta$  with  $\beta$ ). Gaps arose when one or more chains from the query complex were missing in the target complex. For these cases, we identify differences in subunit composition of the complex. Chains that did not share detectable sequence homology but showed identical PFAM (El-Gebali et al., 2019) or ECOD (Schaeffer et al., 2017) domain architecture were assigned an arbitrary sequence identity of 20%. Ultimately, this process yielded a table (‘composition similarity table’) containing 43,893,877 QS pairs stored as part of the 3DComplex MySQL database.

### Structure comparison

To save computation time, we carried out structural alignments between potential matches only. That is, pairs of structures sharing sequence homology (>20% average sequence identity), with at least half of the subunits of the target matching the query. Ultimately, we measured the structural similarity of 13,549,218 QS pairs using Kpax (Ritchie, 2016) and the heuristic previously employed (Dey et al., 2018). We recorded the TM-score between both QSs, as well as all the individual chain-chain TM-scores that are stored in our MySQL database as the “structural similarity table.”

### Annotation procedure

The overall workflow is illustrated in Figure S4, and detailed explanations with examples for the different annotations are given in Table S2. The information gathered from the sequence, and structural comparisons were used to develop an annotation inference methodology described in the pseudocode “QSinfer<sup>HET</sup>” (Supplementary Note) to subsequently infer the most likely ‘physiological’ (annotation id #1) QS of hetero-oligomers. Briefly, a query QS is annotated as correct if a homologous QS (maximum sequence identity between two chains <80%) has the same composition and a similar structure (TM-score > 0.6 and all chain-chain TM-scores above 0.45). The sequence identity cut-off for homology was set to 80% to reduce the chance that the same crystal packing is formed on account of protein-surface similarity. The annotation process was carried out for each symmetry group separately, by decreasing number of subunits. This order is to ensure that lowest order oligomers (e.g., AB) are annotated last if no evidence for the formation of a higher-order structure is found (e.g., A2B2). Once all QSs from a symmetry group were processed, those annotated as correct were used to search for possible errors or sub-complexes among structures not yet annotated. The step of using correctly annotated structures to infer erroneous ones is described in the pseudocode “QSpropagate<sup>HET</sup>” (Supplementary Note). This propagation step involves identifying proteins with an identical sequence and dissimilar QS/composition to that of the other QS annotated as correct in the QSinfer step.

Annotations arising from the propagation step correspond to annotation groups 2–9, and they depend on:

- The number of subunits of the QS inferred as correct (QS1) and the one to be annotated (QS2),
  - Differences in composition/stoichiometry between QS1 and QS2. Here, a complex “including” another complex means that all subunits of the smaller complex match a respective subunit (sequence identity >95%) in the larger one.
  - The TM-score between the two QSs being considered, as well as local (chain-chain) TM-scores between chains overlapping in the QS.
1. As we saw above, when QS1 and QS2 share the same structure, their QS is conserved and is annotated as likely physiological (annotation id #1). In contrast, when two QSs share the same subunits but differ in structure, stoichiometry, or show additional subunit types, we annotate them as follows:
  2. QS2 and QS1 share the same composition and number of subunits, but their TM-score is < 0.6. However, the PISA prediction for QS2 matches QS1, indicating that the conserved QS does exist in QS2’s crystal lattice. Thus, the PDB-form of QS2 is annotated with ‘Crystal interface’; (annotation id #2)

3. If QS2 and QS1 share the same composition, but QS2 shows a lower stoichiometry, then QS2 is annotated with '*Sub-stoichiometry*'; (annotation id #3)
4. If QS2 and QS1 have a different composition and QS2 is included in QS1, i.e., QS2 has missing subunits types, then QS2 is annotated as '*Sub-composition*'; (annotation id #4)
5. If QS2 includes QS1 and shows a TM-score > 0.9, then QS2 is annotated as '*Excessive stoichiometry*'; (annotation id #5)
6. If QS2 includes QS1 and shows a TM-score < 0.9, QS2 is annotated as '*Crystal interface or large conformational change*'; (annotation id #6)
7. If QS2 and QS1 share the same composition and number of subunits, but their TM-score is < 0.65, then QS2 is annotated as '*Crystal interface or large conformational change*'; (annotation id #7)
8. If two different assemblies of the same PDB code are supported by structural similarity, they are tagged as '*Ambiguous*'; (annotation id #8).
9. If the total number of structurally similar homologs supporting a particular QS is low compared to the total number of homologs (i.e., <5%), the QS is also tagged as '*Ambiguous*' (annotation id #9).

### Benchmarking predictions

We benchmarked the automated annotations from QSalign<sup>HET</sup> against the manually annotated dataset PiQSi<sup>HET</sup>. After the annotation procedure, we counted the number of structures in the following categories: TP (true positives), annotated as correct by both QSalign<sup>HET</sup> and PiQSi<sup>HET</sup>; FP (false positives), annotated as correct by QSalign<sup>HET</sup> and as incorrect by PiQSi<sup>HET</sup>; FN (false negatives), annotated as incorrect by QSalign<sup>HET</sup> and as correct by PiQSi<sup>HET</sup>; and TN (true negatives), annotated as incorrect by both QSalign<sup>HET</sup> and PiQSi<sup>HET</sup>. We calculated the error rate of 'correct' annotations by the false discovery rate  $FDR = FP/(TP + FP)$  and the error rate of 'incorrect' annotations by the false omission rate  $FOR = FN/(FN + TN)$ . The dataset of structures on which these rates were calculated was filtered at a level of 90% sequence identity.

### Integrating QS information into QSbio

QS predictions from PISA and EPPIC were integrated along with QSalign<sup>HET</sup> annotations to create a meta-predictor QSbio. For this, we compared the structure of assemblies predicted by both methods. Two assemblies were considered identical when the TM-score was above 0.9. We then estimated the confidence of different categories of agreement between methods using PiQSi<sup>HET</sup>, as done previously for homo-oligomers (Dey et al., 2018).

### QUANTIFICATION AND STATISTICAL ANALYSIS

Statistical details are provided in the methods section where applicable.

**Structure, Volume 29**

**Supplemental Information**

**PDB-wide identification of physiological  
hetero-oligomeric assemblies based  
on conserved quaternary structure geometry**

**Sucharita Dey and Emmanuel D. Levy**

**Supplementary Table S2** | All QSalig<sup>HET</sup> annotation categories and their numbers with an example. The last two columns show the numbers of each annotation type from PiQSi<sup>HET</sup>, related to Figure 2.

| ID | Annotation                                       | #    | #NR  | Annotation example (sentence)                                                                                                                                                                                                   | Detailed explanation<br><b>Note:</b> a complex "including" another means that all subunits of the smaller complex match a respective subunit (sequence identity > 95%) in the larger one.                                                                                                                                                                                                                                  | #NO | #YES |
|----|--------------------------------------------------|------|------|---------------------------------------------------------------------------------------------------------------------------------------------------------------------------------------------------------------------------------|----------------------------------------------------------------------------------------------------------------------------------------------------------------------------------------------------------------------------------------------------------------------------------------------------------------------------------------------------------------------------------------------------------------------------|-----|------|
| 1  | Physiologically relevant                         | 7810 | 1747 | <i>Query: 4az0_1; QS geometry similar to that of 1gxs_1 (TM=0.85; seq identity: avg=30%, max=35%)</i>                                                                                                                           | A query complex is assigned this annotation when a target complex with a similar QS is found, yielding evidence of QS conservation.                                                                                                                                                                                                                                                                                        | 161 | 4    |
| 2  | Crystal interface                                | 260  | 101  | <i>Query: 1bi8_1; QS geometry similar to that of 1g3n_4 (TM=0.93; seq-identity: avg=73%) - Note that 1bi8_1 PISA QS was used to detect structural similarity.</i>                                                               | A query complex is assigned this annotation when the PISA-predicted QS for that same complex is different but likely correct, as inferred from QS conservation.<br><br>These crystal contacts are the ones we are most confident about because an alternative and conserved interface exists in the lattice of that structure.                                                                                             | 2   | 5    |
| 3  | Sub-stoichiometry                                | 523  | 108  | <i>Query: 1mmf; This QS has the same composition as 1iwp_1 (which is likely correct), but 1mmf subunits are in lower stoichiometry.</i>                                                                                         | A query complex is assigned this annotation when another complex with identical composition but higher stoichiometry has been found, and the higher-stoichiometry was validated by QS conservation.                                                                                                                                                                                                                        | 1   | 43   |
| 4  | Sub-composition                                  | 84   | 22   | <i>Query: 1auj; This QS has a subset of subunits present in 1tco_1 (which is likely correct).</i>                                                                                                                               | A complex is flagged with this annotation when it is included in another complex. This does not invalidate the QS <i>per se</i> , but rather serves to inform on alternative compositions.                                                                                                                                                                                                                                 | 2   | 0    |
| 5  | Excessive stoichiometry                          | 989  | 358  | <i>Query: 2r9p; This QS has the same composition as 3p95_1 (which is likely correct) but subunits are in higher stoichiometry with no support from evolutionary conservation.</i>                                               | A complex is flagged with this annotation when it includes another complex and shares the same subunit composition so the difference lies in the subunit stoichiometries. While evolutionary conservation of QS is detected for the lower-stoichiometry form only, it does not necessarily invalidate the higher-stoichiometry form.                                                                                       | 12  | 6    |
| 6  | Crystal interface or large conformational change | 277  | 102  | <i>Query: 3dhh; This QS shows different stoichiometry and/or composition to 5tds_1 (which is likely correct) along with significant structural changes (TM-score=0.4991). Chain-chain matching information: B:B:301:92:99.</i>  | A query complex is assigned this annotation when it includes another complex and shows structural differences, hinting at a possible crystal interface or a conformational change. The difference in composition/stoichiometry may be associated with the structural differences detected. This is why we consider this case separately from the next one (#7), where there is no difference in composition/stoichiometry. | 3   | 3    |
| 7  | Crystal interface or large conformational change | 96   | 24   | <i>Query: 4fxk; This QS shows the same stoichiometry and composition to 5jtw_2 but the structure is different, (TM-score=0.4777). This might reflect that an incorrect QS or may originate in large conformational changes.</i> | A query complex is assigned this annotation when the size and the composition is the same between the two complexes, but they differ structurally.                                                                                                                                                                                                                                                                         |     |      |
| 8  | Ambiguous                                        | 133  | 43   | <i>Query: 4c3o_1; PDB and PISA assemblies are different, but both show QS conservation with 4kl8_1 and 5a4f_1 respectively, based on the target 2frv_4.</i>                                                                     | These are sub-classes of ID#2. PDB and PISA QS are different and both have evidence of structural conservation                                                                                                                                                                                                                                                                                                             | 3   | 0    |
| 9  | Ambiguous                                        | 130  | 53   |                                                                                                                                                                                                                                 | The number of structures supporting the annotation is less than 5% of the size of the family                                                                                                                                                                                                                                                                                                                               |     |      |

**Supplementary Table S4** | Prediction statistics for individual methods, related to Figure 4.

| Method                 | TP  | FN (total<br>#positives = 203) | TN | FP (total<br>#negatives = 79) |
|------------------------|-----|--------------------------------|----|-------------------------------|
| PISA                   | 130 | 73                             | 61 | 18                            |
| EPPIC                  | 123 | 80                             | 49 | 30                            |
| QSalign <sup>HET</sup> | 195 | 8                              | 70 | 9                             |
| QSbio                  | 158 | 4                              | 41 | 9                             |

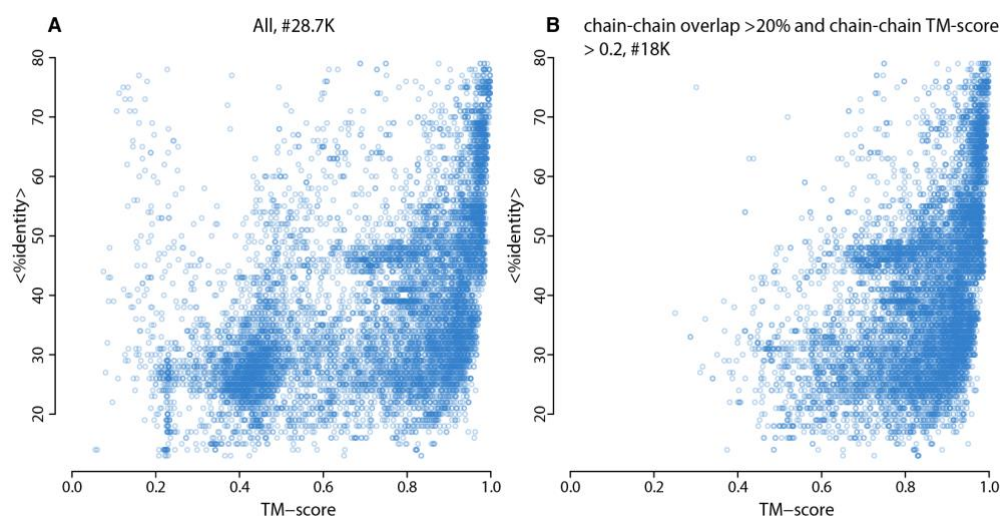

**Supplementary Figure S1.** TM-scores of pairs of complexes compared by QSalign<sup>HET</sup> **A.** When comparing the TM-score as a function of sequence identity, an explosion of data is expected at values below 0.5, which corresponds to very distant and unrelated structures. However, here we only compare the structure of complexes for which the composition is matched in the first place based on sequence similarity or domain architecture when no sequence similarity is detected. Hence, low TM-score values are comparatively rare and arise from a lack of quaternary structure conservation rather than from a lack of subunit structure conservation. Altogether there are ~28,700 pairs of QS pairs at a redundancy level of 90% **B.** We show the same information with two added constraints enforced in QSalign<sup>HET</sup> to infer that two Qs are conserved. First, matched chains across two complexes must overlap at least 20% (i.e., the shortest chain must cover at least 20% of the longest chain). Second, the TM-score of individual chains is calculated based on the global alignment, and we require a minimum chain-chain score of 0.2 (indicating that chains are at least occupying a similar position in the complex). Most of the pairs with low TM-score are eliminated with these constraints. As a result, most pairs show TM-scores > 0.5, which is why the optimization shown in Fig. 3A appears relatively independent of the TM-score value. Related to Figure 3.



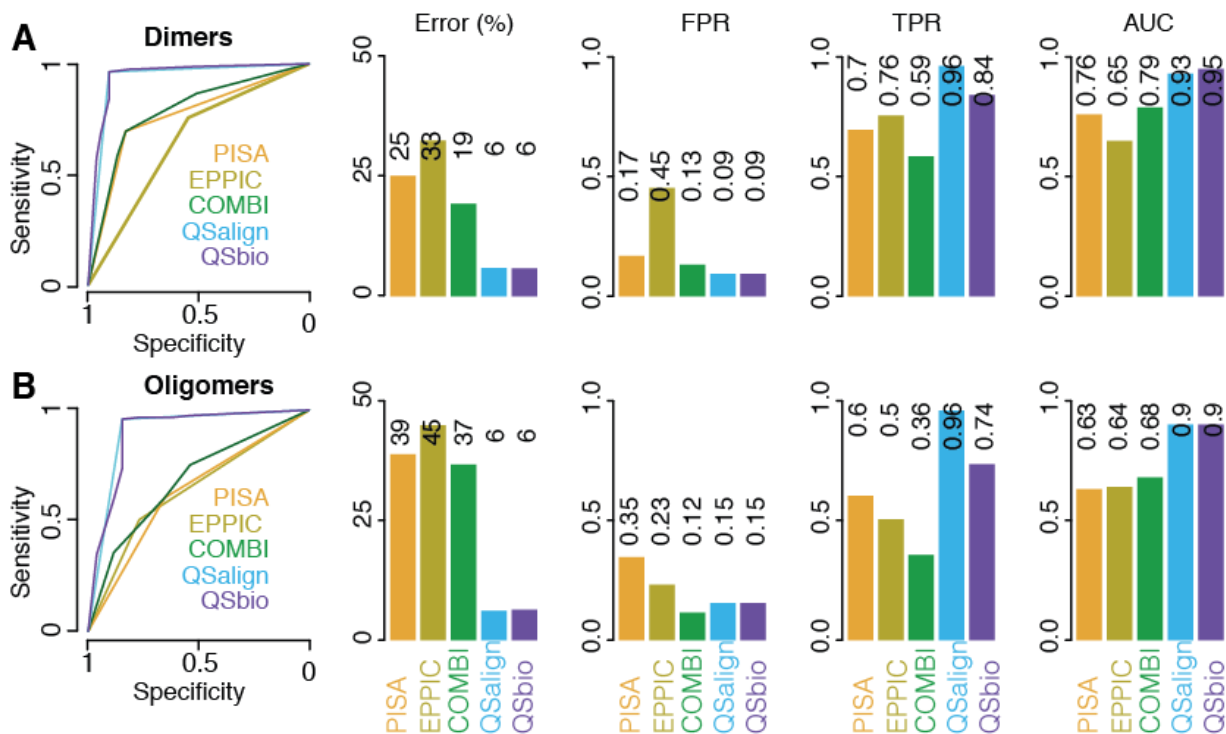

**Supplementary Figure S2.** Benchmarking of the individual methods and their combination into QSbio separately for dimers and oligomers (assemblies with three subunits and more). Related to Figure 4.

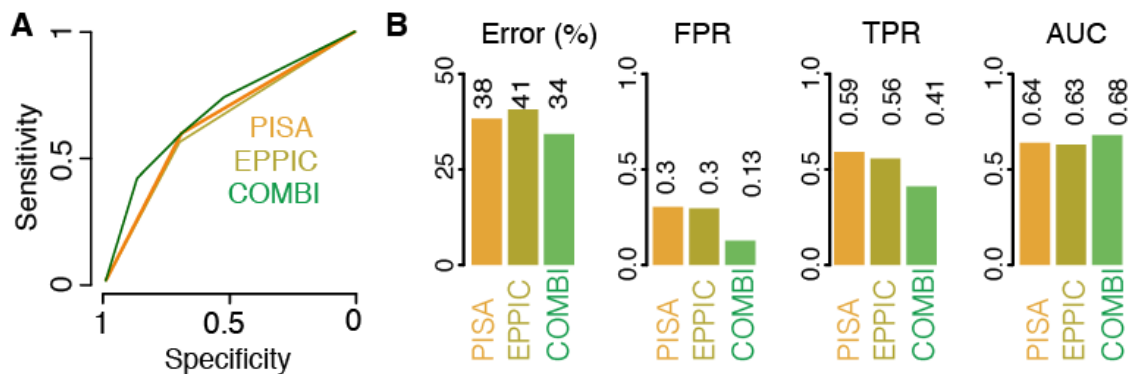

**Supplementary Figure S3.** Results of PISA and EPPIC benchmark on the full manually curated dataset. **A.** ROC curves show the area under the curve (AUC) for each method for dimers and higher-order oligomers altogether. **B.** Values of statistics derived from the benchmark are shown in the barplots. FPR, false-positive rate; TPR, true positive rate; AUC, area under the curve. Related to Figure 4.

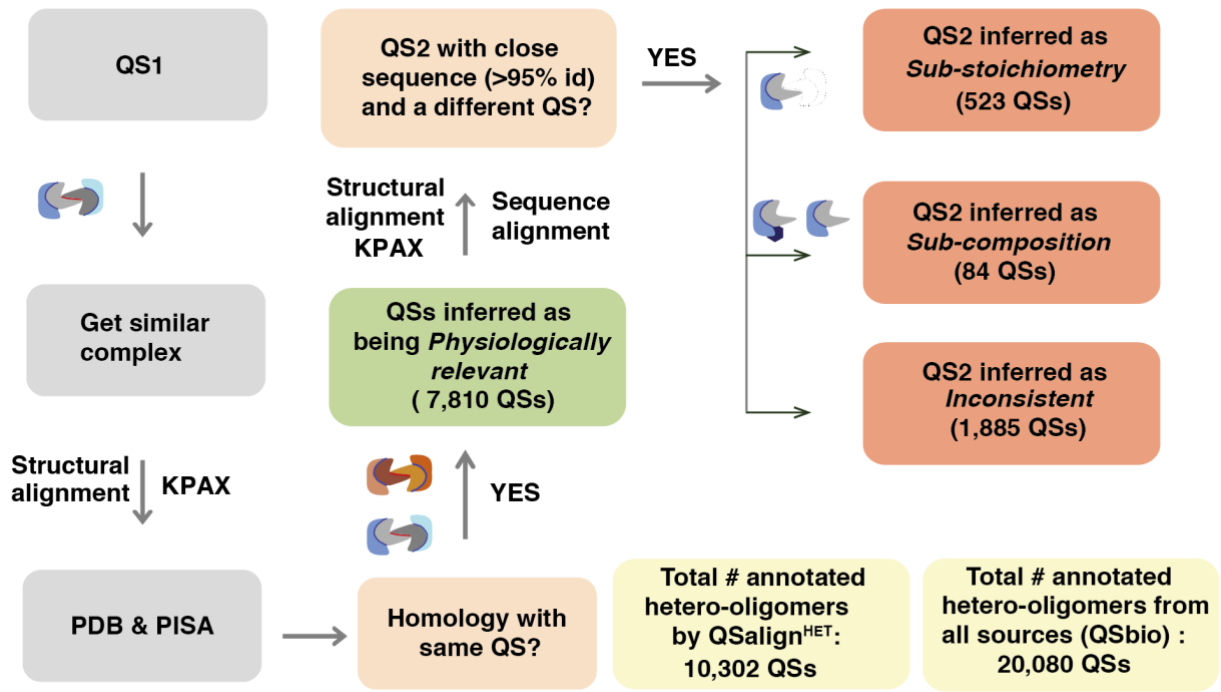

**Supplementary Figure S4.** Schematic representation of the workflow involved in annotating the hetero-oligomers by QSalign<sup>HET</sup>. Related to STAR Methods.

## Supplementary Methods 1. Description of QSinfer<sup>HET</sup> and QSpropagate<sup>HET</sup> routines with pseudo-code. Related to STAR Methods.

### Function QSinfer<sup>HET</sup>:

Retrieve list **L1** of "symmetry type (**SYM**) - number of subunits (**SUB**)" pairs, sorted in decreasing order by number of subunits

For pairs (**SYM<sub>i</sub>**, **SUB<sub>i</sub>**) in **L1**:

Retrieve list **L2** of structure pairs **PDB1**, **PDB2** that meet the following criteria, sorted by increasing minimum sequence identity.

- Symmetry == **SYM<sub>i</sub>**
- Number of subunits == **SUB<sub>i</sub>**
- Maximum Sequence identity < 80%
- Minimum sequence identity > 10%
- Global QS alignment with TM-Score > 0.6
- Minimum TM-score of a chain pair > 0.45
- Overlap of sequence alignment > 0.6
- Number of chains of **PDB1** not having mapped chains in **PDB2** == **ngaps** = 0

# Note: **PDB2<sub>i</sub>** can be from PISA but is sorted after the match with the PDB structure if it exists

For pairs (**PDB1<sub>i</sub>**, **PDB2<sub>i</sub>**) in **L2**:

if **PDB1<sub>i</sub>** is not already annotated:

Mark **PDB1<sub>i</sub>** as likely correct "*Interface geometry is similar to that of PDB2<sub>i</sub>*"

Mark **PDB1<sub>i</sub>** as annotated

if **PDB2<sub>i</sub>** is not already annotated:

if **PDB2<sub>i</sub>** is from PDB:

Mark **PDB2<sub>i</sub>** as likely correct "*Interface geometry is similar to that of PDB1<sub>i</sub>*"

elseif **PDB2<sub>i</sub>** is generated by PISA:

Mark **PDB2<sub>i</sub>** as likely incorrect "*Interface geometry is similar to that of PDB2<sub>i</sub> but was detected based on PISA and does not appear in the PDB assembly*"

Mark **PDB2<sub>i</sub>** as annotated

Call: QSpropagate<sup>HET</sup>(**SYM<sub>i</sub>**, **SUB<sub>i</sub>**)

-----

### Function QSpropagate<sup>HET</sup>(**SYM<sub>i</sub>**, **SUB<sub>i</sub>**):

Retrieve List **L3** of structure pairs **PDB1**, **PDB2** that meet the following criteria:

- **PDB1** is annotated as likely correct
- **PDB1** symmetry == **SYM<sub>i</sub>**
- **PDB2** is not yet annotated
- Minimum sequence identity between **PDB1** and **PDB2** > 95%
- Number of chains from the query complex that are missing in the target complex, i.e., number of 'gaps' (defined as **ngaps**)

For pairs (**PDB1<sub>j</sub>**, **PDB2<sub>j</sub>**) in **L3**:

Define **#PDB1<sub>j</sub>** and **#PDB2<sub>j</sub>** as numbers of subunits in **PDB1<sub>j</sub>** and **PDB2<sub>j</sub>** respectively

Case 1: **#PDB2<sub>j</sub>** < **#PDB1<sub>j</sub>** and **ngaps<sub>j</sub>** = (**#PDB2<sub>j</sub>** - **#PDB1<sub>j</sub>**) and **T** > 0.9 and matched composition:

Mark **PDB2<sub>j</sub>** as sub-stoichiometry "*This QS has the same composition as PDB1<sub>j</sub> but subunits are in lower stoichiometry*"

Case 2: **#PDB2<sub>j</sub>** < **#PDB1<sub>j</sub>** and **ngaps<sub>j</sub>** = (**#PDB2<sub>j</sub>** - **#PDB1<sub>j</sub>**) and **T** > 0.9 and unmatched composition:

Mark **PDB2\_j** as *sub-composition* "This QS has a subset of the subunits present in **PDB1\_j**"

Case 3: **#PDB2\_j** > **#PDB1\_j** and **ngaps\_j** = 0 and **T** > 0.9:

Mark **PDB2\_j** as *Excessive-stoichiometry* "This QS is included in **PDB1\_j**"

Case 4: **#PDB2\_j** != **#PDB1\_j** and **T** < 0.9:

Mark **PDB2\_j** as *Crystal interface or larger conformational change* "This QS shows different stoichiometry and/or composition as **PDB1\_j** along with significant structural changes"

Case 5: **#PDB2\_j** == **#PDB1\_j** and **ngaps\_j** = 0 and **T** < 0.65:

Mark **PDB2\_j** as *Crystal interface or larger conformational change* "This QS shows the same stoichiometry and composition as **PDB1\_j** but the structure is different. This might reflect an incorrect QS or may originate in large conformational changes"

-----  
Case 6: If two or more different **QSs** are found to have structural homologs, or if the total number of structural homologs supporting a **QS** is < 5%

Mark **QS** as *Ambiguous*
